# Supplementary material for: An Empirical Study on Data Validation Methods of Delphi and General Consensus
Source: MDPI journal article supplement (doi:10.3390/data7020018), 2022-01-27
Supplement: s1 [file s1]

Archive with 1 entries (1 files):
- data-1509534-supplementary.pdf
